# Supplementary material
Source: publisher figshare collection journal article supplement (https://karger.figshare.com/ndownloader/files/11081081)
Supplement: Supplementary file 1 [file 11081081]

**C-reactive protein and procalcitonin in case reports of Drug Reaction with Eosinophilia and Systemic Symptoms (DRESS) Syndrome**

S. T. Hübner1,2, R. Bertoli3, A. E. Rätz Bravo2, M. Schaueblin4, M. Haschke5,6, K. Scherer1,7, A. Ceschi3,8, A. B. Leuppi-Taegtmeyer1,2

1 University of Basel, Basel Switzerland

2 Division of Clinical Pharmacology & Toxicology and Regional Pharmacovigilance Center, University Hospital Basel

3Division of Clinical Pharmacology and Toxicologyand Regional Pharmacovigilance Center, Institute of Pharmacological Sciences of Southern Switzerland, Ente Ospedaliero Cantonale, Lugano, Switzerland

4 Unit Pharmacovigilance, Division Safety of Medicines, Swissmedic, Swiss Agency for Therapeutic Products, Berne

5 Clinical Pharmacology and Toxicology, Department of General Internal Medicine, Inselspital, Bern University Hospital, University of Bern

6 Institute of Pharmacology, University of Bern, Switzerland

7 Allergy Unit, Department of Dermatology, University Hospital Basel

8 Department of Clinical Pharmacology and Toxicology, University Hospital Zurich, Zurich, Switzerland

**Supplementary Table: List of included literature cases**

| **Reference** | **Title** |
| --- | --- |
| 13 | Cantarin-Extremera V, Castano-De La Mota C, Alvarez-Coca J, et al. Procalcitonin, a high acute phase reactant in antiepileptic hypersentivity syndrome in pediatric age. Eur J Paediatr Neurol. 2012;16:200-2. |
| 14 | Bonaci-Nikolic B, Jeremic I, Nikolic M, et al. High procalcitonin in a patient with drug hypersensitivity syndrome. Intern Med. 2009;48:1471-4. |
| 22 | Yıldırım Y, Kara AV, Yılmaz Z, et al. Cefuroxime Axetil Related DRESS (drug reaction with eosinophilia and systemic symptoms) Syndrome. European Journal of General Medicine. 2016;13(2):161-4. |
| 23 | Blair PW, Herrin D, Abaalkhail N, Fiser W. DRESS syndrome presenting after initiation of mycobacterium avium complex osteomyelitis treatment. BMJ Case Rep. 2015. http://dx.doi.org/10.1136/bcr-2015-210907 |
| 24 | Draz N, Datta S, Webster DP, Cropley I. Drug reaction with eosinophilia and systemic symptoms (DRESS) syndrome secondary to antituberculosis drugs and associated with human herpes virus-7 (HHV-7). BMJ Case Rep. 2013. http://dx.doi.org/10.1136/bcr-2013-010348 |
| 25 | Kuhn A, Weiler-Normann C, Schramm C, et al. Acute Liver Failure Following Minocycline Treatment–A Case Report and Review of the Literature. Zeitschrift für Gastroenterologie. 2012;50:771-5. |
| 26 | Wendland T, Daubner B, Pichler WJ. Ceftobiprole associated agranulocytosis after drug rash with eosinophilia and systemic symptoms induced by vancomycin and rifampicin. British journal of clinical pharmacology. 2011;71:297-300. |
| 27 | Guner MD, Tuncbilek S, Akan B, Caliskan-Kartal A. Two cases with HSS/DRESS syndrome developing after prosthetic joint surgery: does vancomycin-laden bone cement play a role in this syndrome? BMJ Case Rep. 2015. http://dx.doi.org/10.1136/bcr-2014-207028 |
| 28 | O'Meara P, Borici-Mazi R, Morton AR, Ellis AK. DRESS with delayed onset acute interstitial nephritis and profound refractory eosinophilia secondary to Vancomycin. Allergy Asthma Clin Immunol. 2011;7:16. |
| 29 | Young S, Ojaimi S, Dunckley H, et al. Vancomycin-associated drug reaction with eosinophilia and systemic symptoms syndrome. Intern Med J. 2014;44:694-6. |
| 30 | Moriceau F, Prothet J, Blaise BJ, et al. DRESS Syndrome in the ICU: When a Patient Is Treated with Multiple Drugs. Case Rep Crit Care. 2016. http://dx.doi.org/10.1155/2016/9453286 |
| 31 | Miyazu D, Kodama N, Yamashita D, et al. DRESS Syndrome Caused by Cross-reactivity Between Vancomycin and Subsequent Teicoplanin Administration: A Case Report. Am J Case Rep. 2016;17:625-31. |
| 32 | Song SM, Cho MS, Oh SH, et al. Liver transplantation in a child with acute liver failure resulting from drug rash with eosinophilia and systemic symptoms syndrome. Korean J Pediatr. 2013;56:224-6. |
| 33 | Schulkes KJ, Tervaert JW, Rijken F, Haas LE. Dapsone hypersensitivity syndrome not related to G6PD deficiency. BMJ Case Rep. 2015. http://dx.doi.org/ 10.1136/bcr-2015-212742 |
| 34 | Tsutsumi R, Adachi K, Yoshida Y, Yamamoto O. Drug-induced hypersensitivity syndrome in association with varicella. Acta Derm Venereol. 2015;95:503-4. |
| 35 | Sawata T, Bando M, Kogawara H, et al. Drug-induced Hypersensitivity Syndrome Accompanied by Pulmonary Lesions Exhibiting Centrilobular Nodular Shadows. Intern Med. 2016;55:1159-63. |
| 36 | Fathallah N, Slim R, Rached S, et al. Sulfasalazine-induced DRESS and severe agranulocytosis successfully treated by granulocyte colony-stimulating factor. Int J Clin Pharm. 2015;37:563-5. |
| 37 | Jeremic I, Vujasinovic-Stupar N, Terzic T, et al. Fatal sulfasalazine-induced eosinophilic myocarditis in a patient with periodic fever syndrome. Med Princ Pract. 2015;24:195-7. |
| 38 | Parkins G, White B. DRESS syndrome presenting like septic shock. QJM. 2013;106:671-3. |
| 39 | Moling O, Tappeiner L, Piccin A, et al. Treatment of DIHS/DRESS syndrome with combined N-acetylcysteine, prednisone and valganciclovir--a hypothesis. Med Sci Monit. 2012;18:CS57-62. |
| 40 | Osman A, Ibrahim W, Khanjar I, et al. Sudden worsening of DRESS syndrome on tapering steroid dose with dramatic improvement on N-acetylcysteine and steroid dose escalation. Ibnosina Journal of Medicine and Biomedical Sciences. 2013;6:101-5. |
| 41 | Cherquaoui H, Samlani Z, Oubaha S, Krati K. Dress syndrome on sulfasalazine for Crohn disease. J Afr Hepat Gastroen. 2015;9:141-3. |
| 42 | Rosenbaum J, Alex G, Roberts H, Orchard D. Drug rash with eosinophilia and systemic symptoms secondary to sulfasalazine. J Paediatr Child Health. 2010;46:193-6. |
| 43 | Girelli F, Bernardi S, Gardelli L, et al. A New Case of DRESS Syndrome Induced by Sulfasalazine and Triggered by Amoxicillin. Case Rep Rheumatol. 2013. http://dx.doi.org/ 10.1155/2013/409152 |
| 44 | Hernandez N, Borrego L, Soler E, Hernandez J. Sulfasalazine-induced linear immunoglobulin A bullous dermatosis with DRESS. Actas Dermosifiliogr. 2013;104:343-6. |
| 45 | Komatsu-Fujii T, Ohta M, Niihara H, Morita E. Usefulness of rapid measurement of serum thymus and activation-regulated chemokine level in diagnosing drug-induced hypersensitivity syndrome. Allergol Int. 2015;64:388-9. |
| 46 | Thistleton S, Grandidge L, Sharlala H, Adebajo A. A hunt for the source of sepsis. BMJ Case Rep. 2014;2014. |
| 47 | Morimoto M, Watanabe Y, Arisaka T et al. A case of drug-induced hypersensitivity syndrome due to carbamazepine. Bull Tokyo Dent Coll. 2011;52:135-42. |
| 48 | Eguchi E, Shimazu K, Nishiguchi K, et al. Granulomatous interstitial nephritis associated with atypical drug-induced hypersensitivity syndrome induced by carbamazepine. Clin Exp Nephrol. 2012;16:168-72. |
| 49 | Matsuda H, Saito K, Takayanagi Y, et al. Pustular-type drug-induced hypersensitivity syndrome/drug reaction with eosinophilia and systemic symptoms due to carbamazepine with systemic muscle involvement. J Dermatol. 2013;40:118-22. |
| 50 | Hase I, Arakawa H, Sakuma H, et al. Bronchoscopic Investigation of Atypical Drug-induced Hypersensitivity Syndrome Showing Viral Lung Involvement. Intern Med. 2016;55:2691-6. |
| 51 | Ono Y, Shimo T, Shirafuji Y, et al. Drug-Induced Hypersensitivity Syndrome Caused by Carbamazepine Used for the Treatment of Trigeminal Neuralgia. Case Rep Dent. 2016.http://dx.doi.org/10.1155/2016/4605231 |
| 52 | Leblebici F, Soyal O, Mutlu NM, et al. Diphenylhydantoin Induced DRESS Syndrome: A Case Report. Turk J Anaesthesiol Reanim. 2014;42:46-9. |
| 53 | Marriott DJ, Periyasamy P. Anticonvulsant hypersensitivity syndrome secondary to lamotrigine mimicking a septic episode. Ann Acad Med Singapore. 2011;40:422-3. |
| 54 | Nares EM, Iñiguez AL, Saldaña SG, et al. Pseudomembranous colitis in a patient with lamotrigine-induced drug rash with eosinophilia and systemic symptoms syndrome. Gastroenterology Insights. 2016;7:6491:22-5. |
| 55 | Gomez-Zorrilla S, Ferraz AV, Pedros C, et al. Levetiracetam-induced drug reaction with eosinophilia and systemic symptoms syndrome. Ann Pharmacother. 2012;46:e20. |
| 56 | Chaabane A, Ben Fadhel N, Chadli Z, et al. Phenobarbital-induced DRESS: a lichenoid picture. Iran J Allergy Asthma Immunol. 2014;13:453-5. |
| 57 | Kellett S, Cock C. A case of drug reaction with eosinophilia and systemic symptoms. Case Rep Med. 2012. http://dx.doi.org/ 10.1155/2012/705190 |
| 58 | Kocaoglu C, Cilasun C, Solak ES, et al. Successful Treatment of Antiepileptic Drug-Induced DRESS Syndrome with Pulse Methylprednisolone. Case Rep Pediatr. 2013. http://dx.doi.org/10.1155/2013/928910 |
| 59 | Loulergue P, Mir O. Raltegravir-induced DRESS syndrome. Scand J Infect Dis. 2012;44:802-3. |
| 60 | Hagihara M, Yamagishi Y, Hirai J, et al. Drug-induced hypersensitivity syndrome by liposomal amphotericin-B: a case report. BMC Res Notes. 2015;8:510. |
| 61 | Turney R, Skittrall JP, Donovan J, Agranoff D. Drug Reaction, Eosinophilia and Systemic Symptoms (DRESS) syndrome secondary to allopurinol with early lymphadenopathy and symptom relapse. BMJ Case Rep. 2015. http://dx.doi.org/10.1136/bcr-2015-211222 |
| 62 | Lim HY, Huang GK, Torresi J, Johnson D. Red herring in returned traveler: drug reaction with eosinophilia and systemic symptom (DRESS) syndrome mimicking sepsis. J Travel Med. 2014;21:425-8. |
| 63 | Kato M, Kano Y, Sato Y, Shiohara T. Severe Agranulocytosis in Two Patients with Drug-induced Hypersensitivity Syndrome/Drug Reaction with Eosinophilia and Systemic Symptoms. Acta Derm Venereol. 2016;96:842-3. |
| 64 | Laurisch S, Jaedtke M, Demir R, et al. [Allopurinol-induced hypersensitivity syndrome resulting in death]. Med Klin (Munich). 2010;105:262-6. |
| 65 | Ronceray S, Dinulescu M, Le Gall F, et al. Enoxaparin-Induced DRESS Syndrome. Case Rep Dermatol. 2012;4:233-7. |
| 66 | Kim DK, Lee SW, Nam HS, et al. A Case of Sorafenib-induced DRESS Syndrome in Hepatocelluar Carcinoma. Korean J Gastroenterol. 2016;67:337-40. |
| 67 | Bourneau-Martin D, Leclech C, Jamet A, et al. Omeprazole-induced drug reaction with eosinophilia and systemic symptoms (DRESS). Eur J Dermatol. 2014;24:413-5. |
| 68 | Kinyo A, Belso N, Nagy N, et al. Strontium ranelate-induced DRESS syndrome with persistent autoimmune hepatitis. Acta Derm Venereol. 2011;91:205-6. |
| 69 | Pirklbauer M, Gruber J. [DRESS syndrome following sulfasalazine treatment]. Z Rheumatol. 2014;73:180-3. |
